# Supplementary material for: The preparation of a highly ordered long-range lamellar silica structure with large interlayer spacingsElectronic supplementary information (ESI) available: Figs. S1–3: XRD, adsorption–desorption isotherms and SEM image. See http://www.rsc.org/suppdata/cc/b2/b204053k/
Source: Royal Society of Chemistry journal article supplement (doi:10.1039/b204053k), 2002-06-26

Supplementary Material (ESI) for Chemical Communications

This journal is © The Royal Society of Chemistry 2002

The preparation of highly ordered long-range lamellar silica structure with large interlayer spacings

An-Wu Xu,* † Jimmy. C. Yu,‡ Yue-Peng Cai,† Hua-Xin Zhang† and Li-Zhi Zhang‡

†*School of Chemistry and Chemical Engineering, Zhongshan University, Guangzhou 510275, China*

‡*Department of Chemistry, The Chinese University of Hong kong, Shatin, New Territories, China*

Correspondence Author: A. W. Xu ([cedc17@zsu.edu.cn](mailto:cedc17@zsu.edu.cn))

**Fig. S1** Powder X-ray diffraction pattern (XRD) of the as-synthesized ZSU-L powders templated from silicone surfactant in acidic media.

**Fig. S2** Nitrogen adsorption-desorption isotherms for the ZSU-L powders calcined at 600 oC for 5 h. Inset, Corresponding Barret-Joyner-Halenda (BJH) pore size distribution curve. N2 adsorption measurements were performed at 77 K using a Micromeritics ASAP 2010 system utilizing Barrett-Emmett-Teller (BET) calculations for surface area and BJH calculations for pore size distribution for the desorption branch of the isotherm.

**Fig. S3** Scanning electron micrographs (SEM) of the calcined ZSU-L powders. The samples were sputter coated with gold and examined with a Hitachi S-520 operated at beam energy of 20.0 kV. Calcination treatments were performed at 800 oC for 5 h in air (heating rate, 1 oC min1). Scale bar : 8 m.


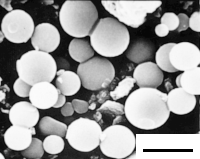

Supplement: b204053k.doc [file b204053k.doc]
